# Supplementary material
Source: ML conference proceedings conference paper supplement (https://proceedings.neurips.cc/paper_files/paper/2019/hash/124c3e4ada4a529aa0fedece80bb42ab-Abstract.html)

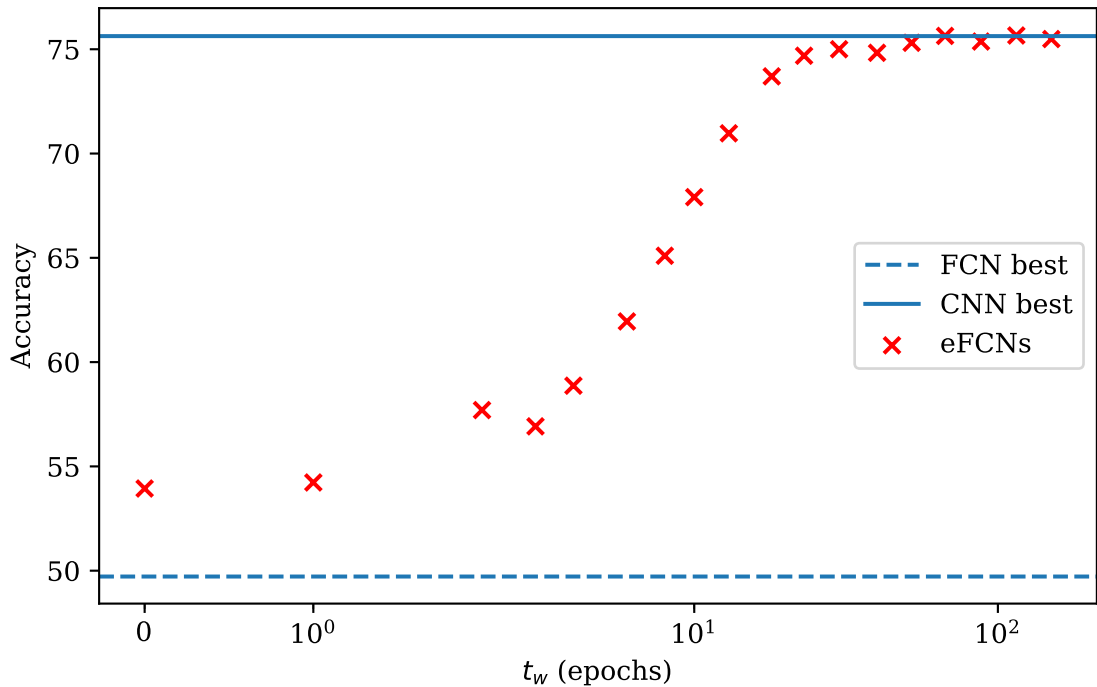

Supplement: Supplementary file [file 124c3e4ada4a529aa0fedece80bb42ab-Supplemental.zip]
